# Supplementary figures and images for: Learning-related population dynamics in the auditory thalamus
Source: eLife journal article supplement (doi:10.7554/elife.56307), 2020-07-08

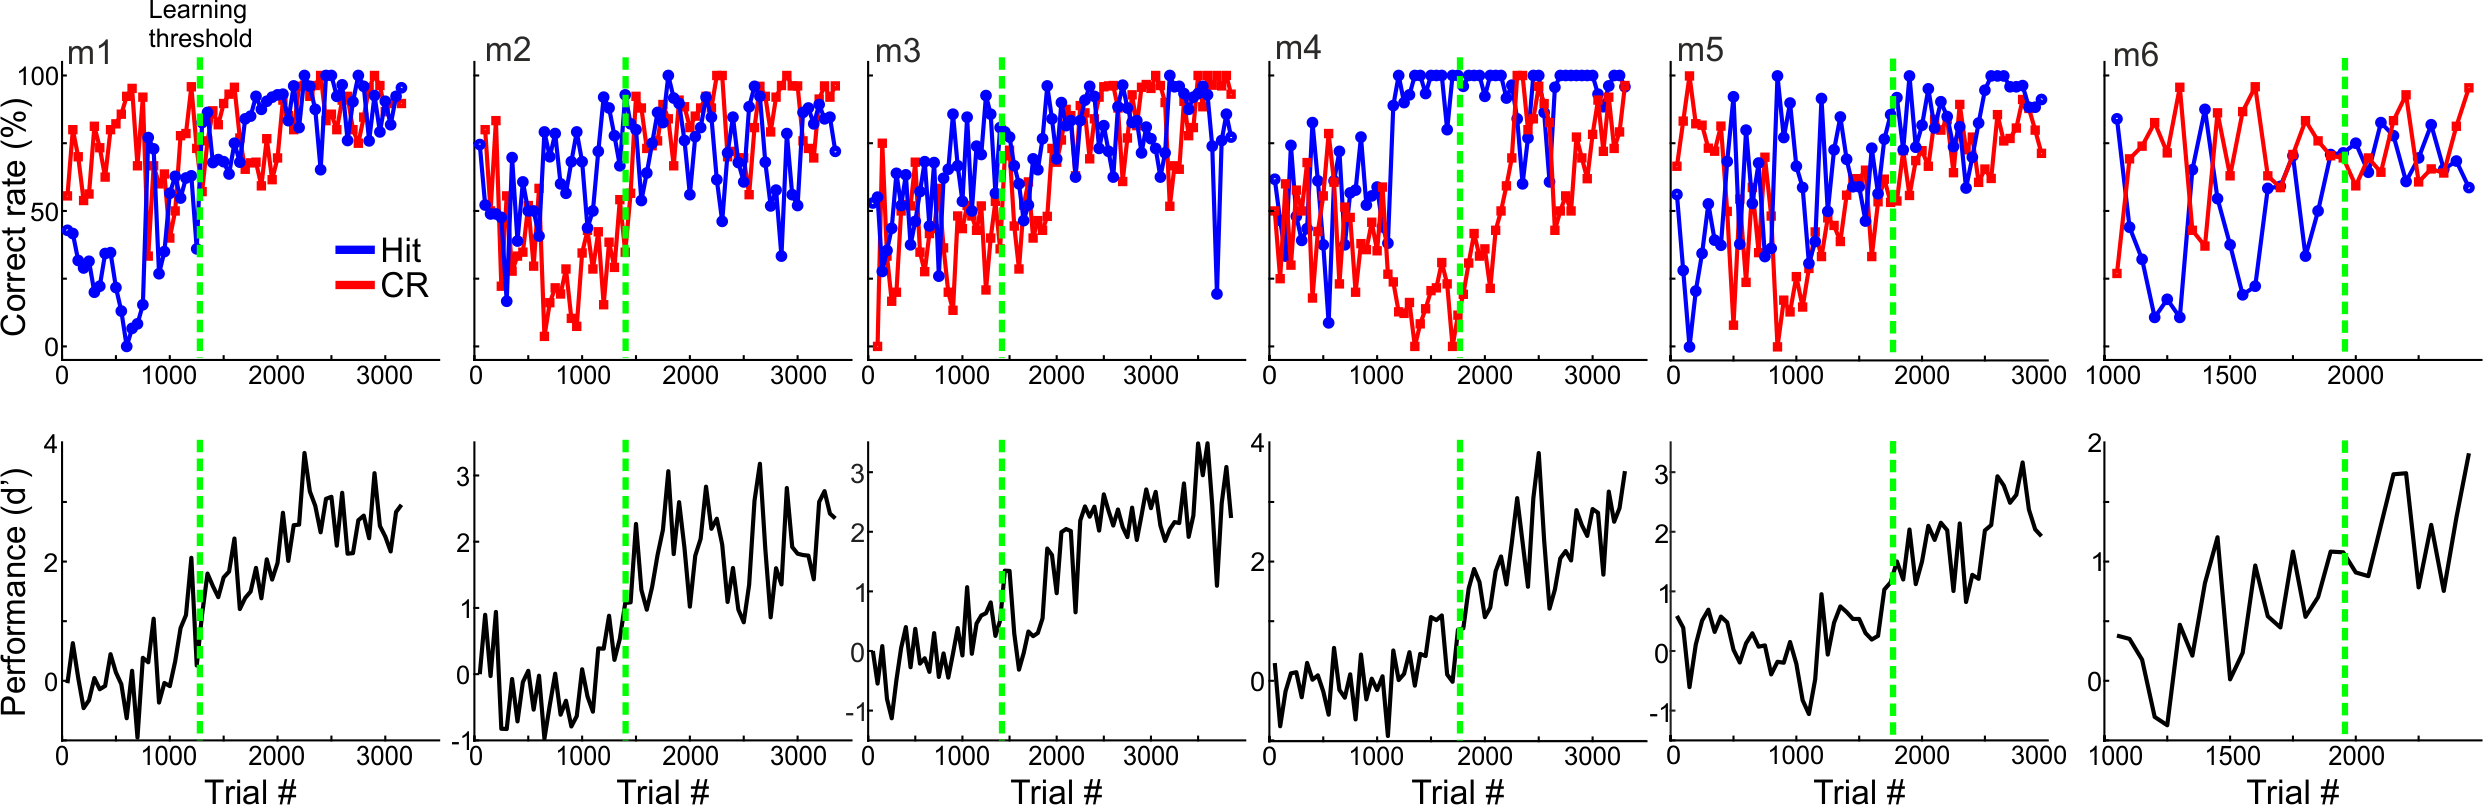

Supplement: supp [file elife-56307-supp-v1.zip › elife_poa_e56307_Figure_1_figure_supplement_1.tif]

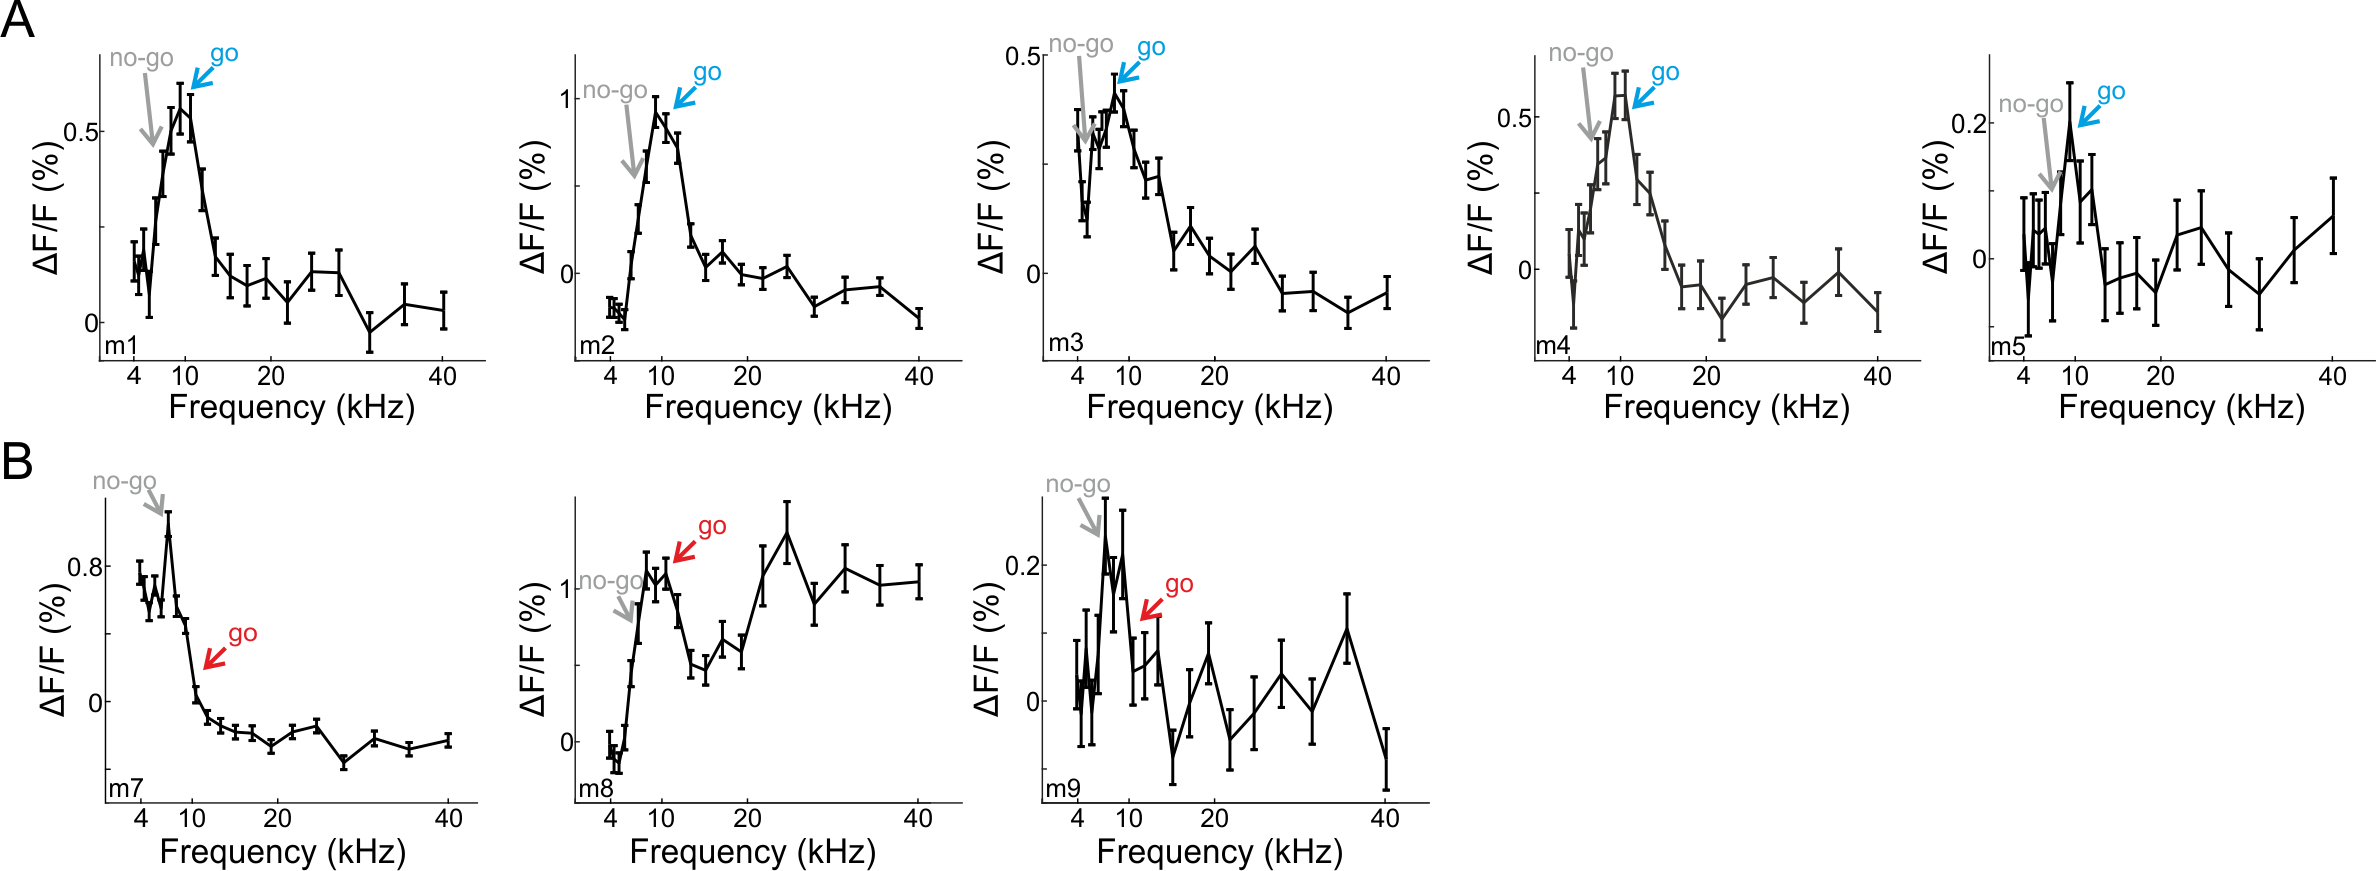

Supplement: supp [file elife-56307-supp-v1.zip › elife_poa_e56307_Figure_1_figure_supplement_2.tif]

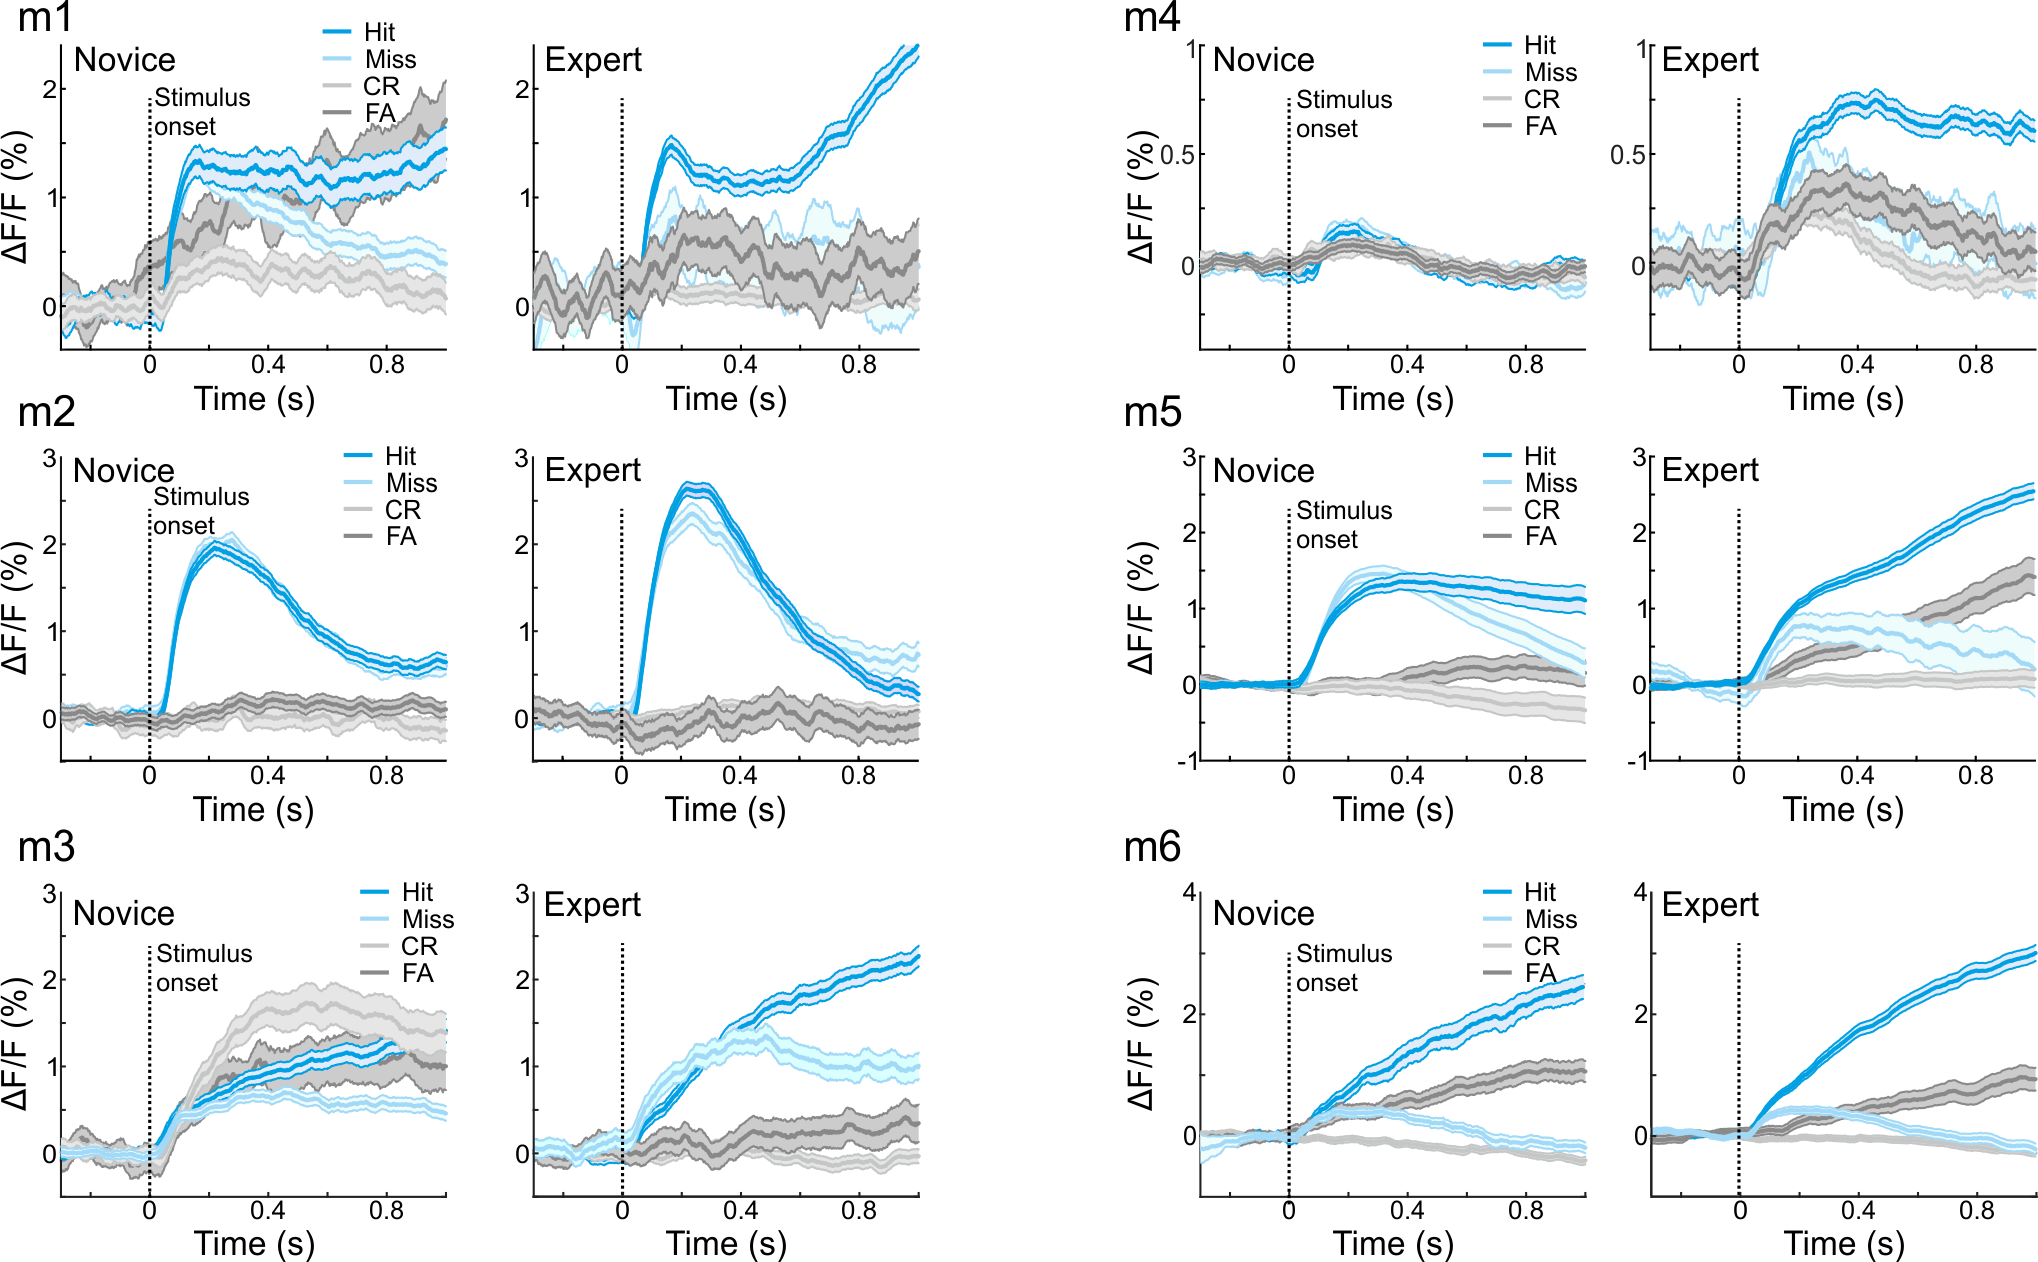

Supplement: supp [file elife-56307-supp-v1.zip › elife_poa_e56307_Figure_2_figure_supplement_1.tif]

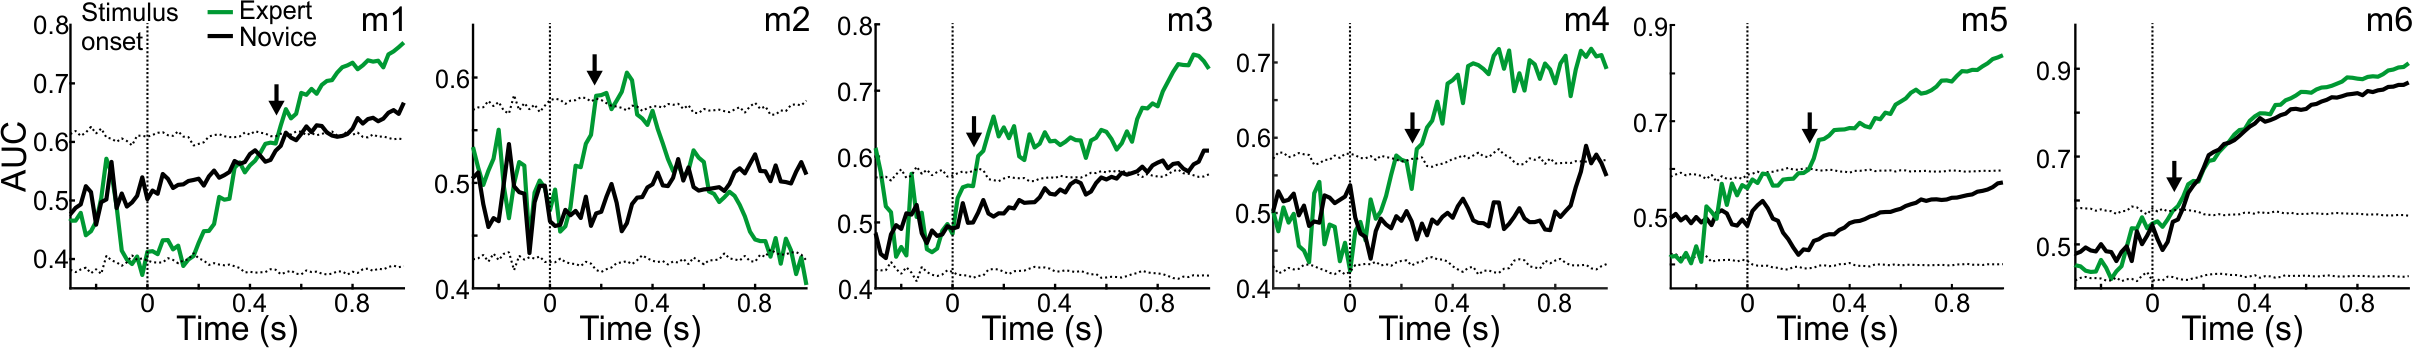

Supplement: supp [file elife-56307-supp-v1.zip › elife_poa_e56307_Figure_3_figure_supplement_1.tif]

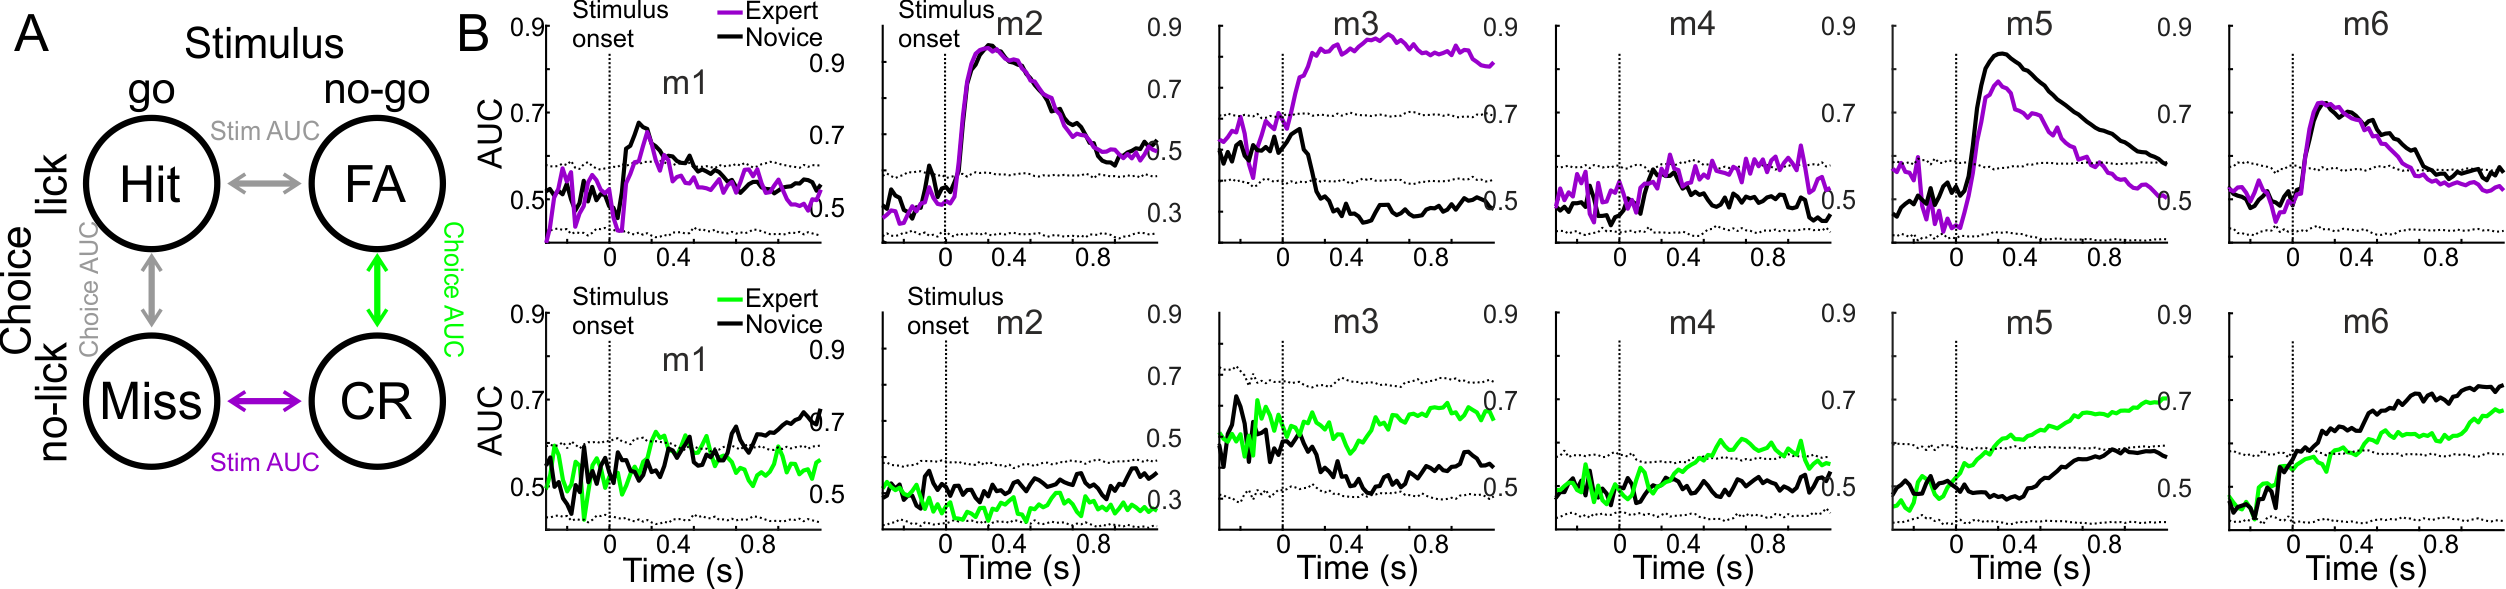

Supplement: supp [file elife-56307-supp-v1.zip › elife_poa_e56307_Figure_3_figure_supplement_2.tif]

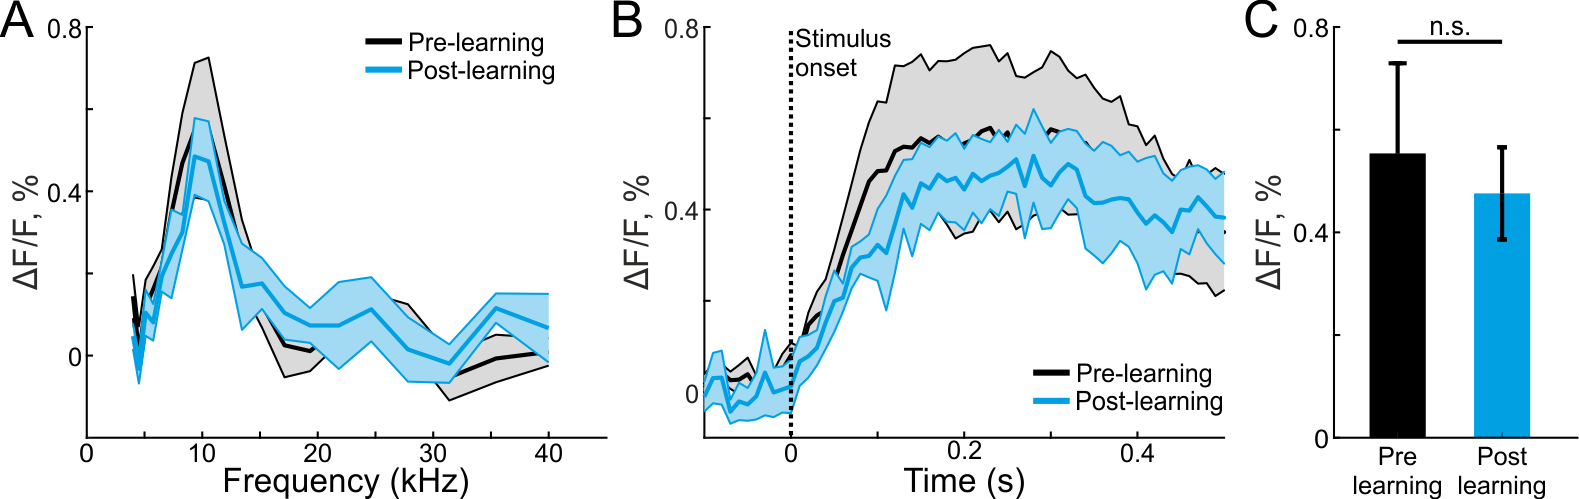

Supplement: supp [file elife-56307-supp-v1.zip › elife_poa_e56307_Figure_4_figure_supplement_1.tif]

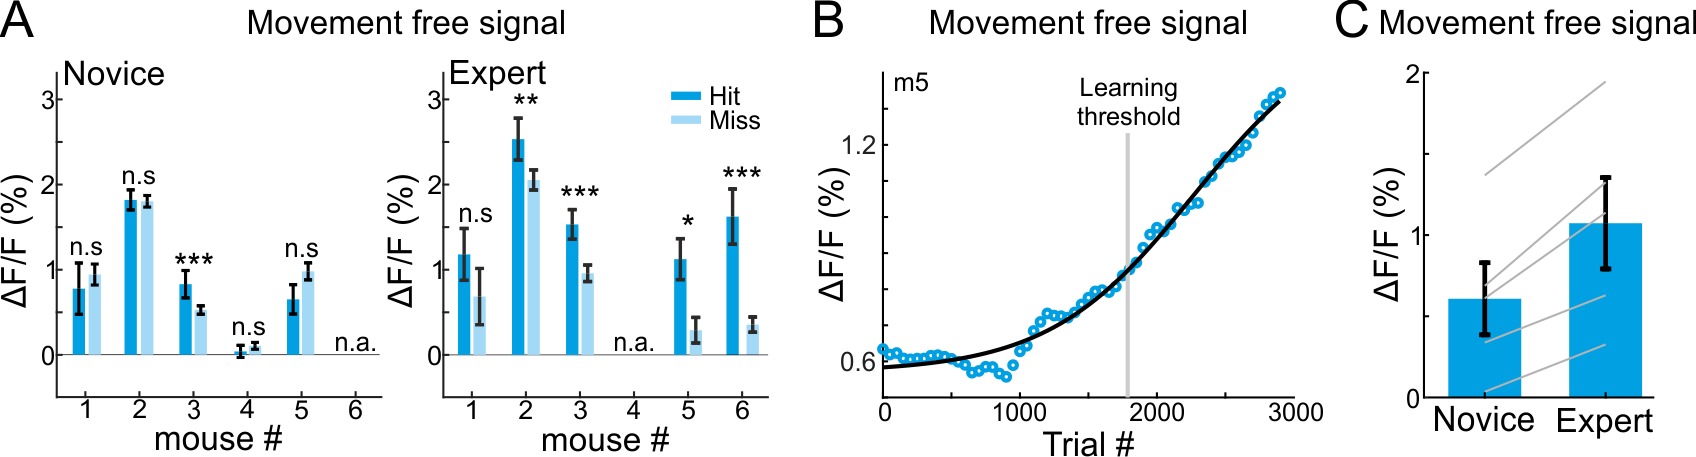

Supplement: supp [file elife-56307-supp-v1.zip › elife_poa_e56307_Figure_5_figure_supplement_1.tif]

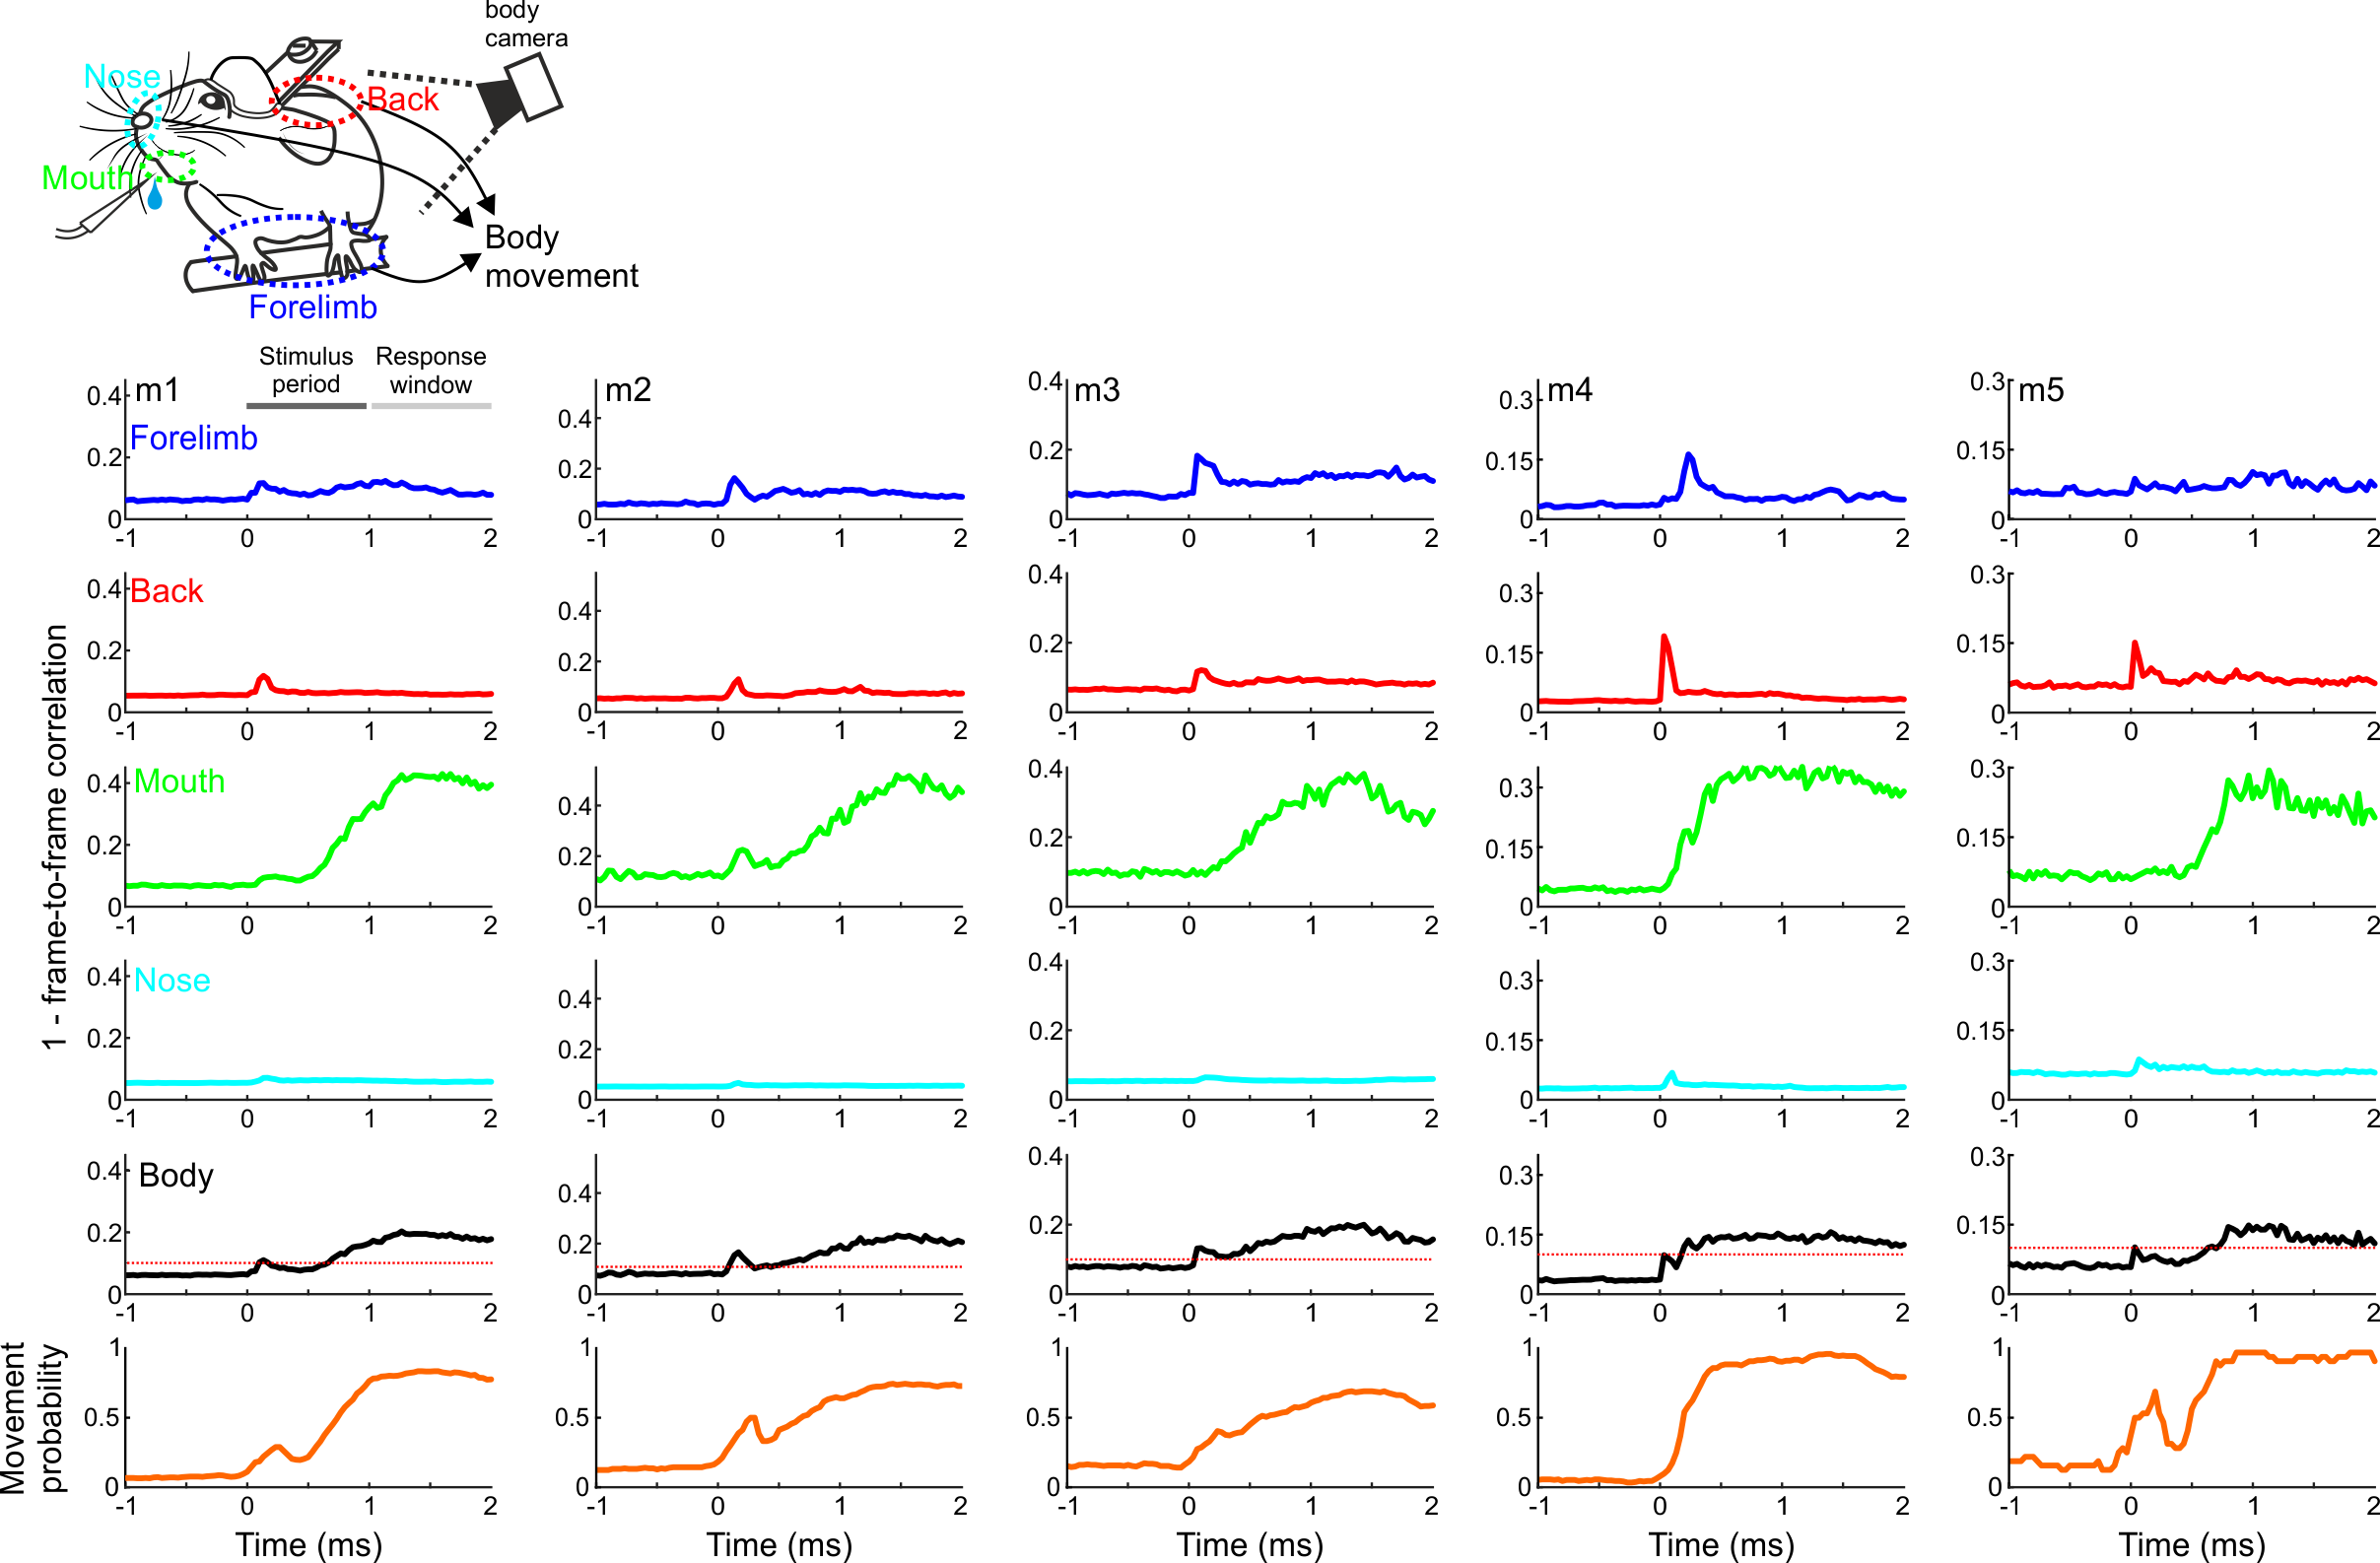

Supplement: supp [file elife-56307-supp-v1.zip › elife_poa_e56307_Figure_5_figure_supplement_2.tif]

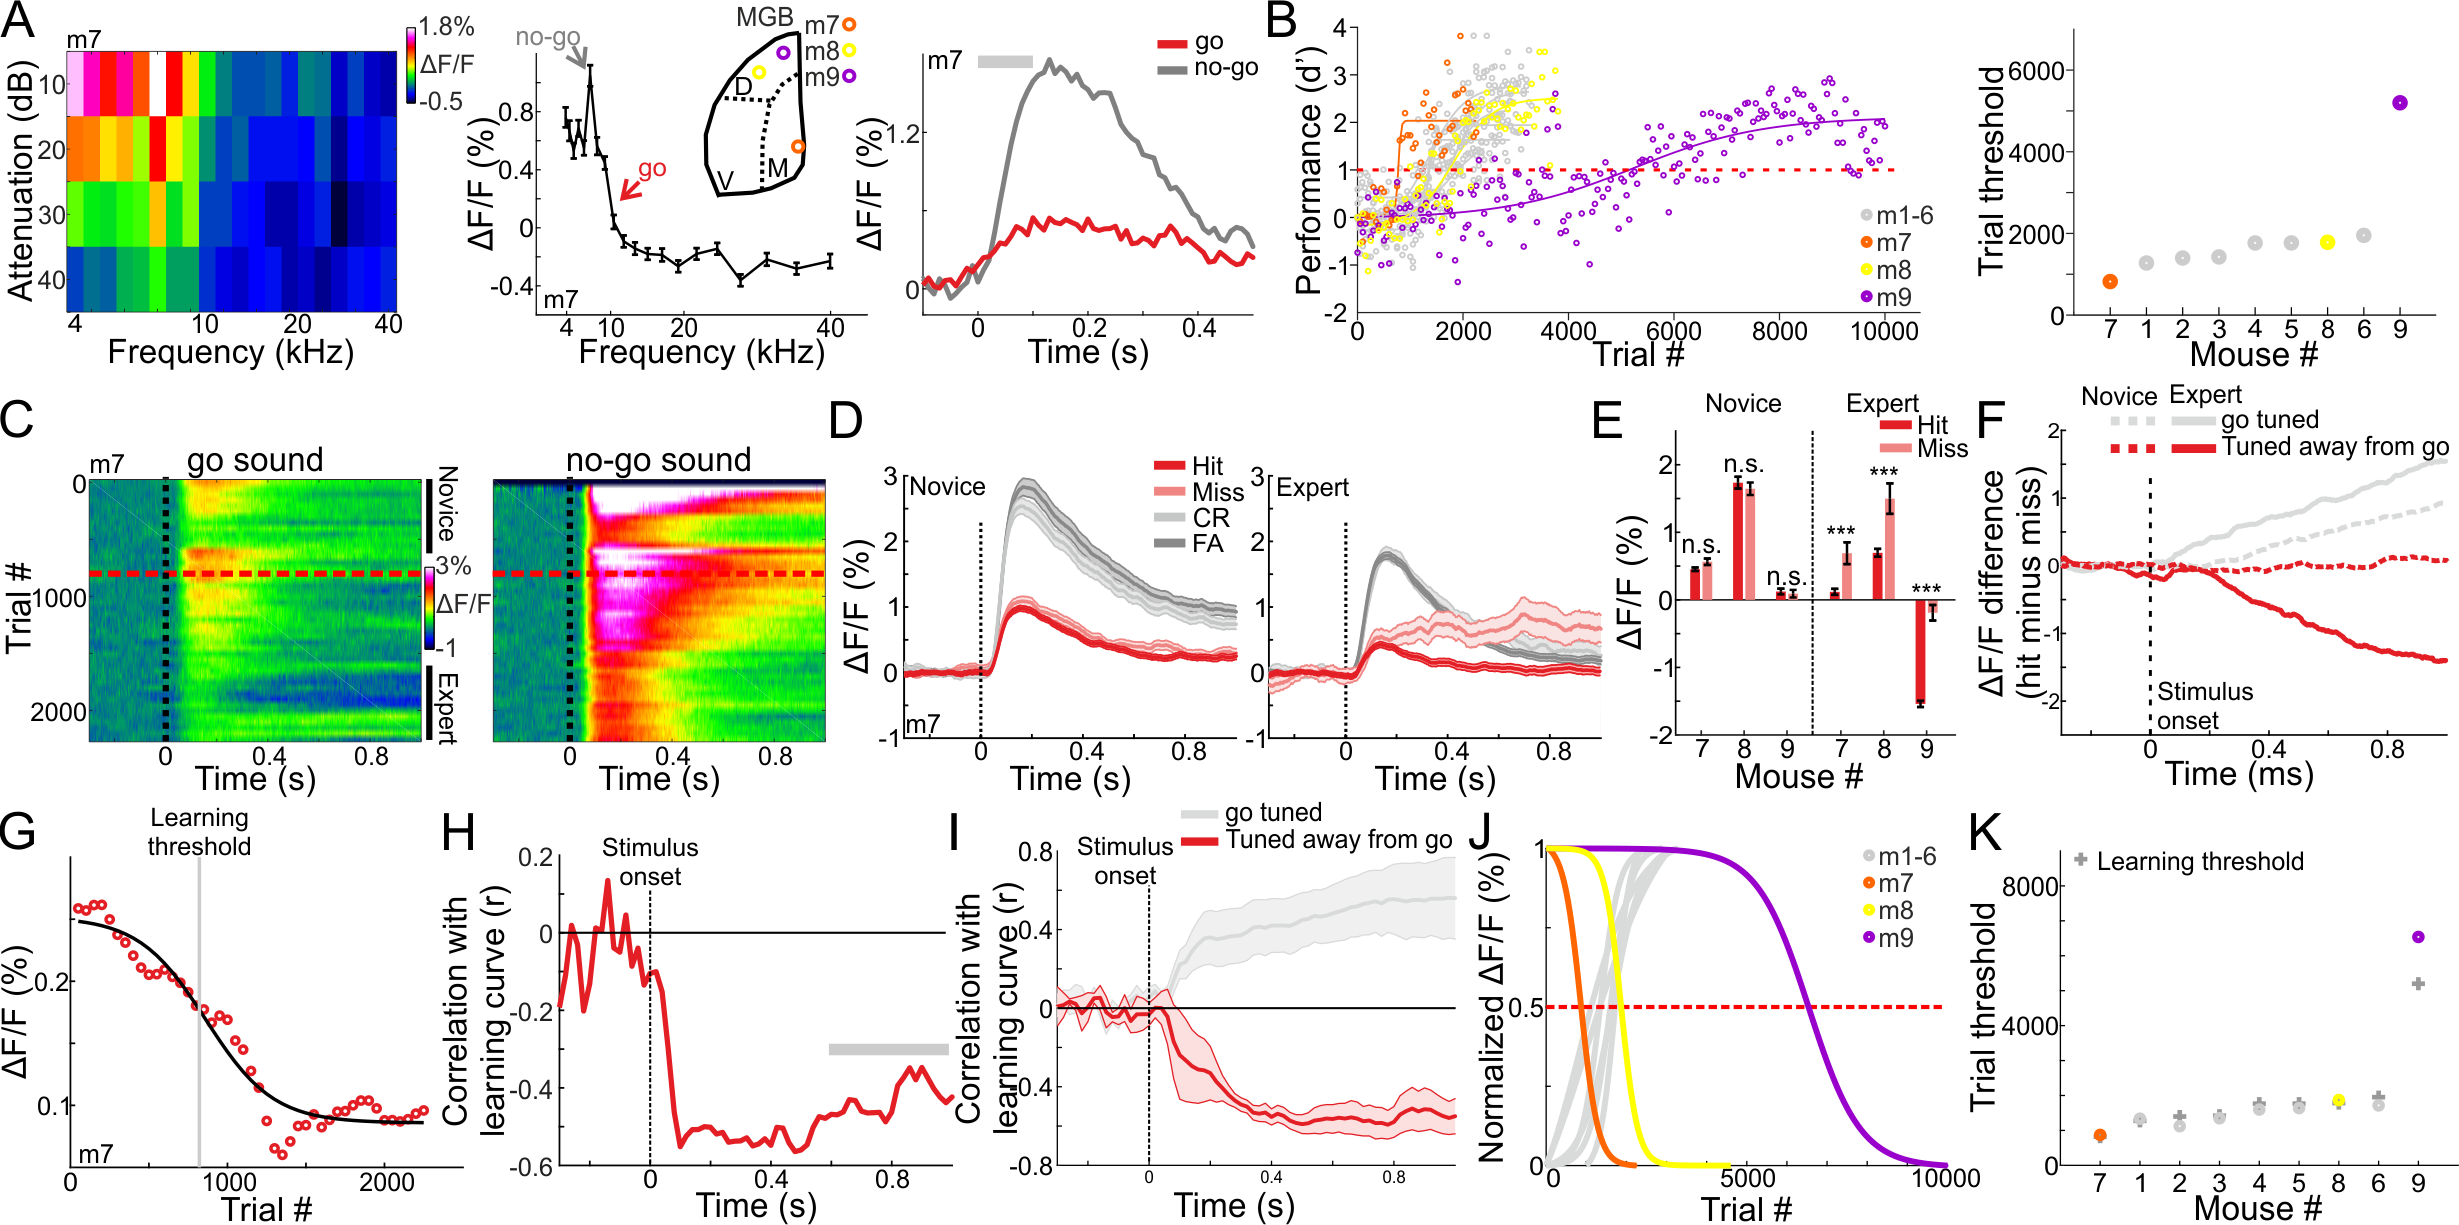

Supplement: supp [file elife-56307-supp-v1.zip › elife_poa_e56307_Figure_6_figure_supplement_1.tif]
